# Supplementary material
Source: HighWire-hosted journal article supplement (https://www.cmajopen.ca/highwire/filestream/85279/field_highwire_adjunct_files/0/2019-0225-1-at.pdf)
Supplement: 2019-0225-1-at.pdf [file 2019-0225-1-at.pdf]

## **Appendix 1: Alberta Seniors' Health Research PSP Partnering Groups, Agencies, and Organizations**

Seniors Health SCN Community of Practice, Alberta Health Services  
Seniors Health SCN Core Committee, Alberta Health Services  
Seniors Health, Community, Seniors, Addiction & Mental Health, Alberta Health Services  
Zone Executive Directors, Seniors Health, Alberta Health Services  
Patient and Family Advisors, Seniors Health SCN, Alberta Health Services  
Patient Engagement Reference Group, Alberta Health Services  
Engagement and Patient Experience, Alberta Health Services  
Senior Medical Directors of SCNs, Alberta Health Services  
Integrated Seniors and Community Care Steering Committee, Alberta Health Services  
Seniors and Continuing Care Provincial Advisory Council, Alberta Health Services  
Alberta Clinician Professional Practice Council, Alberta Health Services  
Health Professions Strategy & Practice, Alberta Health Services  
Age Friendly Calgary  
Age Friendly Edmonton  
Alberta Association of Seniors Centres  
Alberta Association on Gerontology  
Alberta Continuing Care Association  
Alberta Council on Aging  
Alberta Gerontological Nurses Association  
Alzheimer Society of Calgary  
Arthritis Society  
Bethany Care Society  
Brenda Strafford Centre of Aging  
Calgary Seniors Resource Society  
Canadian Association of Retired Persons, Alberta Chapter  
Canadian Depression Research and Intervention Network (CDRIN)  
Dementia Friendly Communities  
Dementia Network Calgary  
EthnoCultural Council of Calgary  
Health Coalition of Alberta  
Heart & Stroke Foundation  
Kerby Centre  
Osteoporosis Canada  
Patients 4 Change  
Physiotherapy Alberta  
Points West Living  
Proactive Seniors  
Provincial Fitness Unit of Alberta  
Sage Seniors Association  
Society of Alberta Occupational Therapists  
SouthEast Edmonton Seniors Association  
The Lung Association  
Trinity Place Foundation of Alberta

Appendix 1, as supplied by the authors. Appendix to: Hanson HM, Cowan K, Wagg A. Identifying what matters most for the health of older adults in Alberta: results from a James Lind Alliance Research Priority Setting Partnership. *CMAJ Open* 2021. DOI:10.9778/cmajo.20190225. Copyright © 2021 The Author(s) or their employer(s). To receive this resource in an accessible format, please contact us at [cmajgroup@cmaj.ca](mailto:cmajgroup@cmaj.ca).
